# Supplementary material for: Platinum: a database of experimentally measured effects of mutations on structurally defined protein–ligand complexes
Source: Oxford University Press journal article supplement (doi:10.1093/nar/gku966), 2014-10-16
Supplement: gku966_Supplementary_Data.zip [file gku966_Supplementary_Data.zip]

Archive with 1 entries (1 files):
- nar-01987-data-e-2014-File005.pdf
