# Supplementary material for: Platinum: a database of experimentally measured effects of mutations on structurally defined protein–ligand complexes
Source: Oxford University Press journal article supplement (doi:10.1093/nar/gku966), 2014-10-16
Supplement: gku966_Supplementary_Data.zip [file gku966_Supplementary_Data.zip › nar-01987-data-e-2014-File005.pdf]

# Platinum: a database of experimentally measured effects of mutations on structurally defined protein-ligand complexes

Douglas E. V. Pires\*, Tom L. Blundell, David B. Ascher\*

## Supplementary Material

### 1 Figures

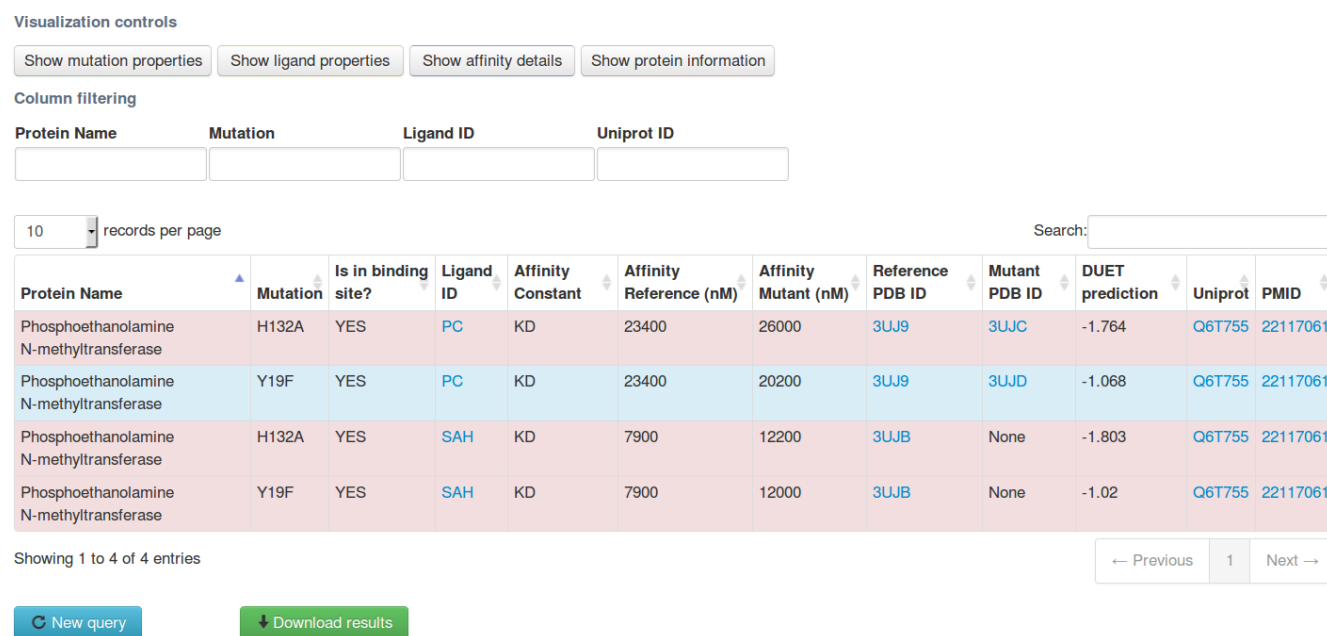

Figure 1: Platinum's web-interface search results page. The query results are displayed in tabular form and can be downloaded as a tab-separated file.

\*Email: dpires@dcc.ufmg.br; Correspondence may also be addressed to dascher@svi.edu.au

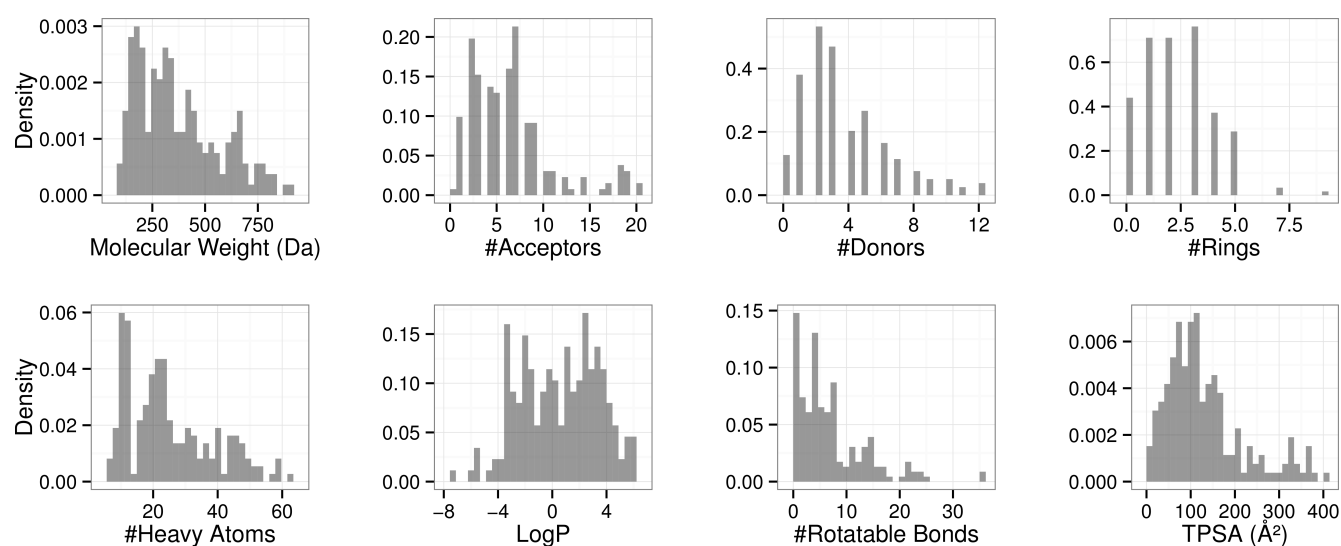

Figure 2: Properties distribution of ligands in Platinum. The figure shows the density distribution of ligand properties in Platinum including: molecular weight, number of hydrogen acceptors and donors, number of rings (top row, from left to right), number of heavy atoms, partition coefficient (logP), number of rotatable bonds and topological polar surface area (TPSA) (bottom row, from left to right).
